# Supplementary material for: Photoelectrochemical water splitting by hematite boosted in a heterojunction with B-doped g-C3N4 nanosheets and carbon nanotubes
Source: Royal Society of Chemistry journal article supplement (doi:10.1039/d4ta02512a), 2024-01-01
Supplement: d4ta02512a1.pdf [file d4ta02512a1.pdf]

## Supplementary information

for

### Photoelectrochemical water splitting by Hematite boosted in heterojunction with B-doped g-C<sub>3</sub>N<sub>4</sub> nanosheets and carbon nanotubes

Irfan Khan,<sup>\*a</sup> Tímea Benkó<sup>a</sup>, Anita Horváth<sup>a</sup>, Shaohua Shen<sup>b</sup>, Jinzhan Su<sup>b</sup>, Yiqing Wang<sup>b</sup>, Zsolt E. Horváth<sup>c</sup>, Miklós Németh<sup>a</sup>, Zsolt Czigány<sup>c</sup>, Dániel Zámbo<sup>c</sup> and József Sándor Pap<sup>a</sup>

<sup>a</sup>HUN-REN Centre for Energy Research, Department of Surface Chemistry and Catalysis, Konkoly-Thege M. Street 29-33, 1121 Budapest, Hungary

<sup>b</sup>International Research Center for Renewable Energy (IRCREE), State Key Laboratory of Multiphase Flow in Power Engineering (MFPE), Xi'an Jiaotong University, Xi'an, China

<sup>c</sup>HUN-REN Centre for Energy Research, Institute of Technical Physics and Materials Science, Konkoly-Thege M. Street 29-33, 1121 Budapest, Hungary

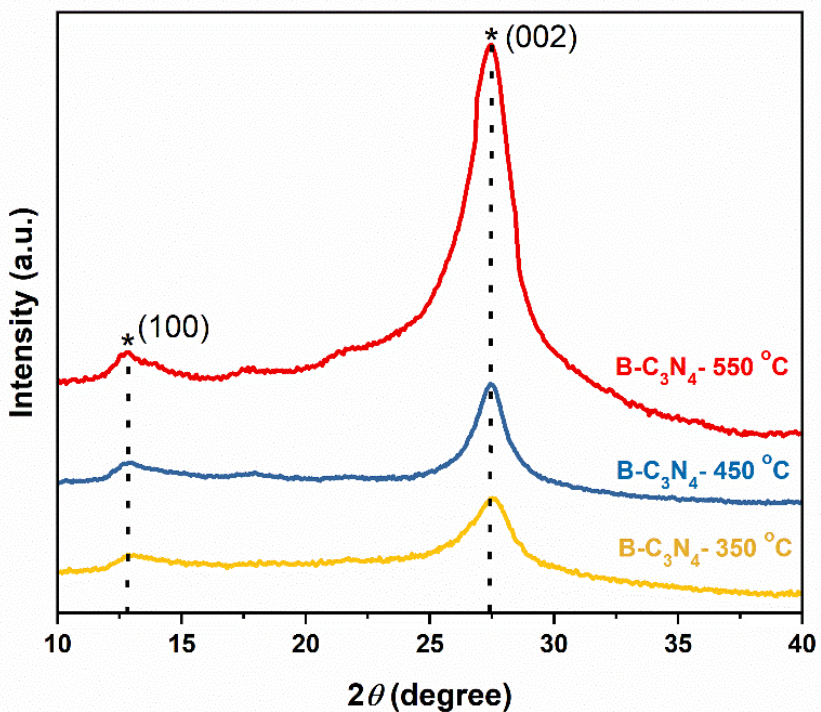

**Figure S1.** XRD of the B-C<sub>3</sub>N<sub>4</sub> samples used in our study with the two expected reflections as discussed in the main text.

## Supplementary information

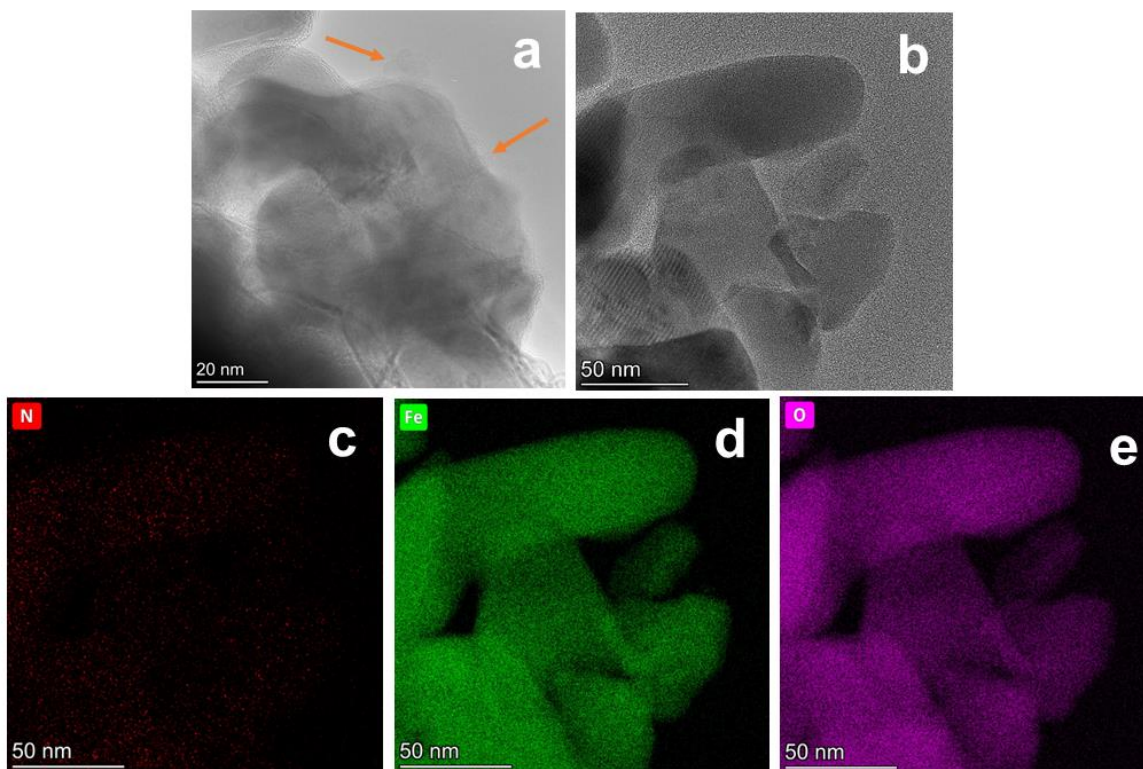

**Figure S2.** HRTEM and STEM-EDS images of the used  $\alpha$ -Fe<sub>2</sub>O<sub>3</sub>/B-C<sub>3</sub>N<sub>4</sub>/p-CNT composite (a-b) showed partial crystalline and amorphous structures layered on the  $\alpha$ -Fe<sub>2</sub>O<sub>3</sub> surface; (c-e) unveiled the homogeneous distribution of nitrogen (N), iron (Fe) and oxygen (O) species across the entirety of the nanorod structures, affirming the successful integration of B-C<sub>3</sub>N<sub>4</sub> dopants into the hematite matrix.

## Supplementary information

**Table S1.** Surface atomic concentrations (%) of the used photoanodes were calculated from XPS data.

|       | Surface atomic concentrations (%)                      |                                                                                       |                                                                                               |
|-------|--------------------------------------------------------|---------------------------------------------------------------------------------------|-----------------------------------------------------------------------------------------------|
|       | <i><math>\alpha</math>-Fe<sub>2</sub>O<sub>3</sub></i> | <i><math>\alpha</math>-Fe<sub>2</sub>O<sub>3</sub> / B-C<sub>3</sub>N<sub>4</sub></i> | <i><math>\alpha</math>-Fe<sub>2</sub>O<sub>3</sub> / B-C<sub>3</sub>N<sub>4</sub> / p-CNT</i> |
| B 1s  | 1.09                                                   | 1.03                                                                                  | 0.94                                                                                          |
| C 1s  | 9.71                                                   | 10.4                                                                                  | 5.7                                                                                           |
| Cl 2p | 0.16                                                   | 0.2                                                                                   | 0.12                                                                                          |
| Fe 2p | 31.94                                                  | 31.36                                                                                 | 35.02                                                                                         |
| N 1s  | 0.36                                                   | 1.09                                                                                  | 0.73                                                                                          |
| Na 1s | 2.37                                                   | 1.89                                                                                  | 1.74                                                                                          |
| O 1s  | 52.43                                                  | 52.17                                                                                 | 54.42                                                                                         |
| S 2p  | 0.91                                                   | 1.26                                                                                  | 1.1                                                                                           |
| Ti 2p | 1.03                                                   | 0.61                                                                                  | 0.23                                                                                          |

## Supplementary information

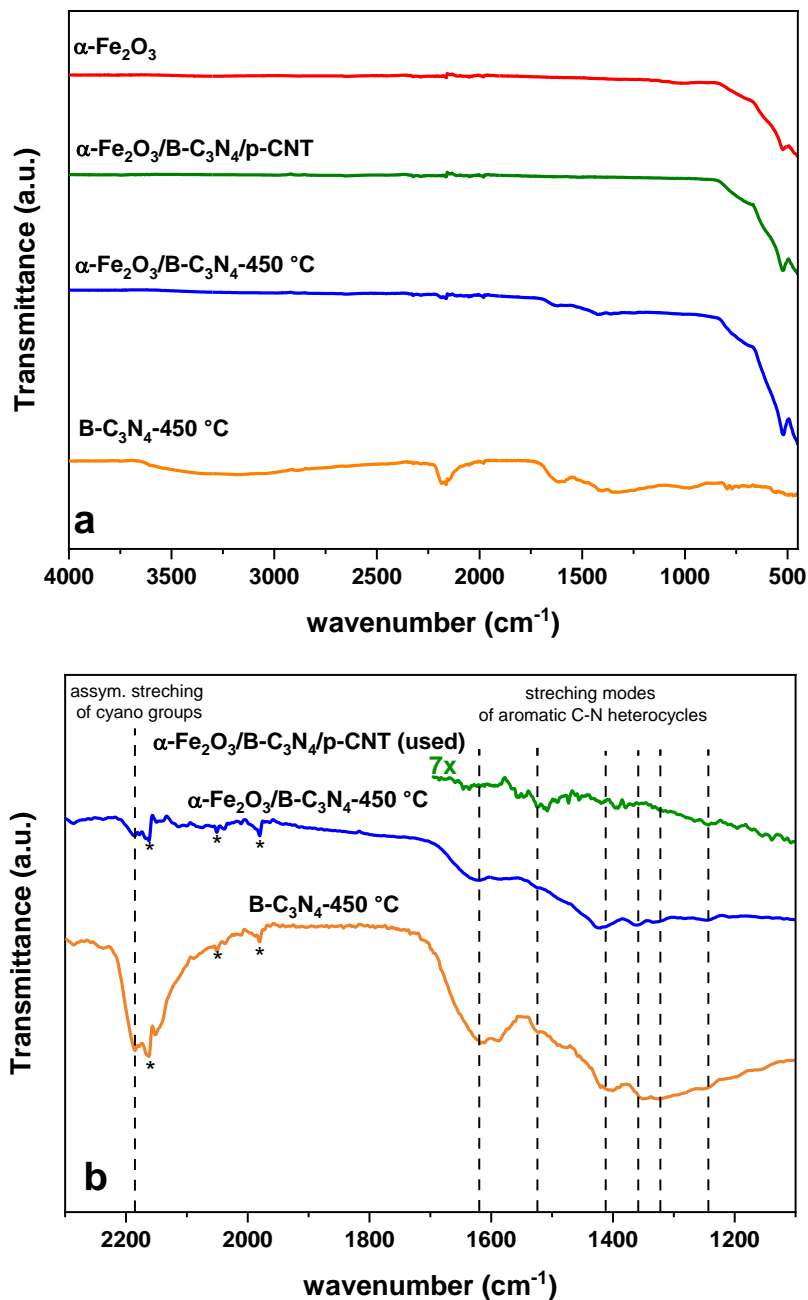

**Figure S3.** (a) ATR-IR spectra of as-synthesized  $\text{B-C}_3\text{N}_4\text{-}450\text{ }^\circ\text{C}$ ,  $\alpha\text{-Fe}_2\text{O}_3$  and  $\alpha\text{-Fe}_2\text{O}_3/\text{B-C}_3\text{N}_4\text{-}450\text{ }^\circ\text{C}$  (enriched twice in  $\text{B-C}_3\text{N}_4\text{-}450\text{ }^\circ\text{C}$  for the analysis), and the used  $\alpha\text{-Fe}_2\text{O}_3/\text{B-C}_3\text{N}_4\text{-}450\text{ }^\circ\text{C}/\text{p-CNT}$  photoanodes; (b) corresponding magnified range of 1100–2300  $\text{cm}^{-1}$ . Characteristic stretching modes correspond with a more detailed analysis of  $\text{B-C}_3\text{N}_4$ , in the ESI of ref. [47]. Asterisks assign artefacts of the diamond detector of the ATR.

## Supplementary information

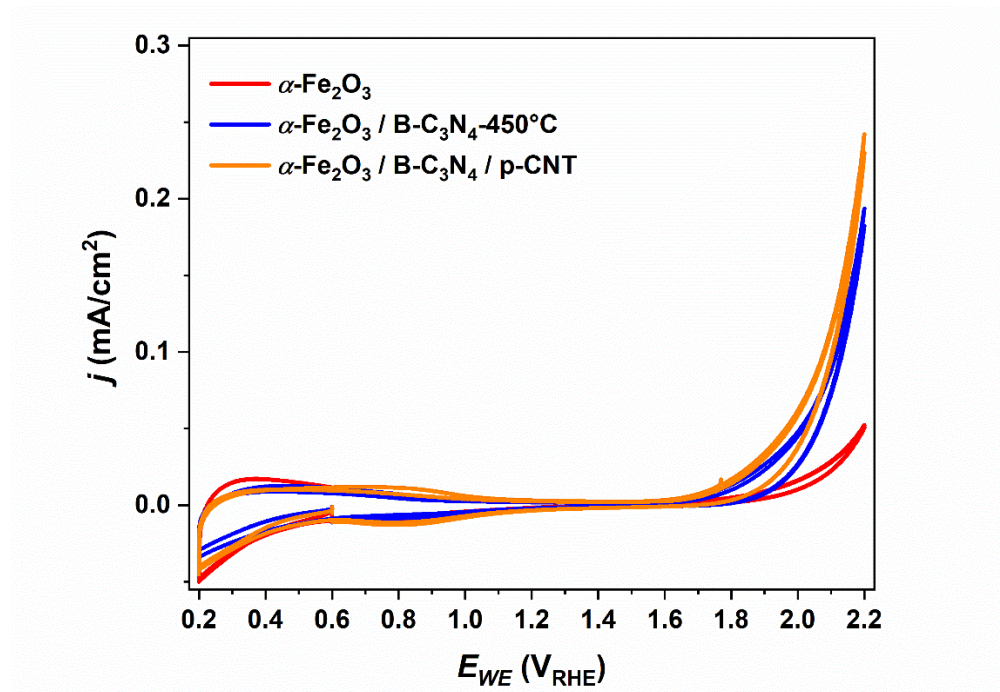

**Figure S4.** Cyclic voltammetry of the photoanodes used in photoelectrochemistry as shown in Figure 4, recorded in the dark, 2 cycles at 5 mVs<sup>-1</sup> in 0.1 M Na<sub>2</sub>SO<sub>4</sub> at pH 7.

## Supplementary information

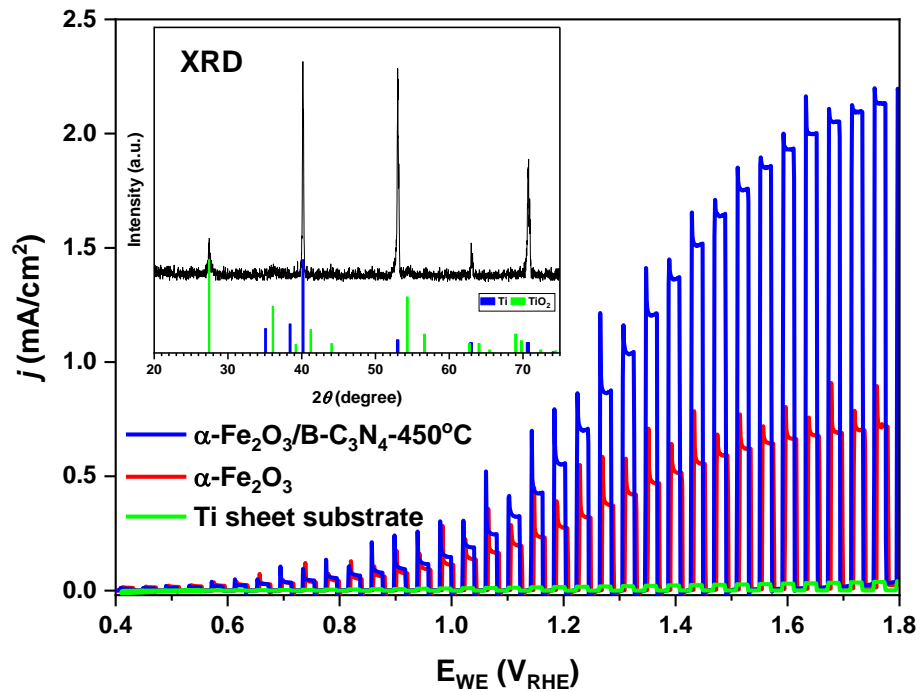

**Figure S5.** Comparative Linear sweep voltammetry plots between uncoated Ti sheet, pristine  $\alpha$ -Fe<sub>2</sub>O<sub>3</sub>,  $\alpha$ -Fe<sub>2</sub>O<sub>3</sub>/B-C<sub>3</sub>N<sub>4</sub>-450 °C obtained in 0.1 M Na<sub>2</sub>SO<sub>4</sub> at pH 7. The inset shows the XRD patterns of the uncoated Ti substrate.

## Supplementary information

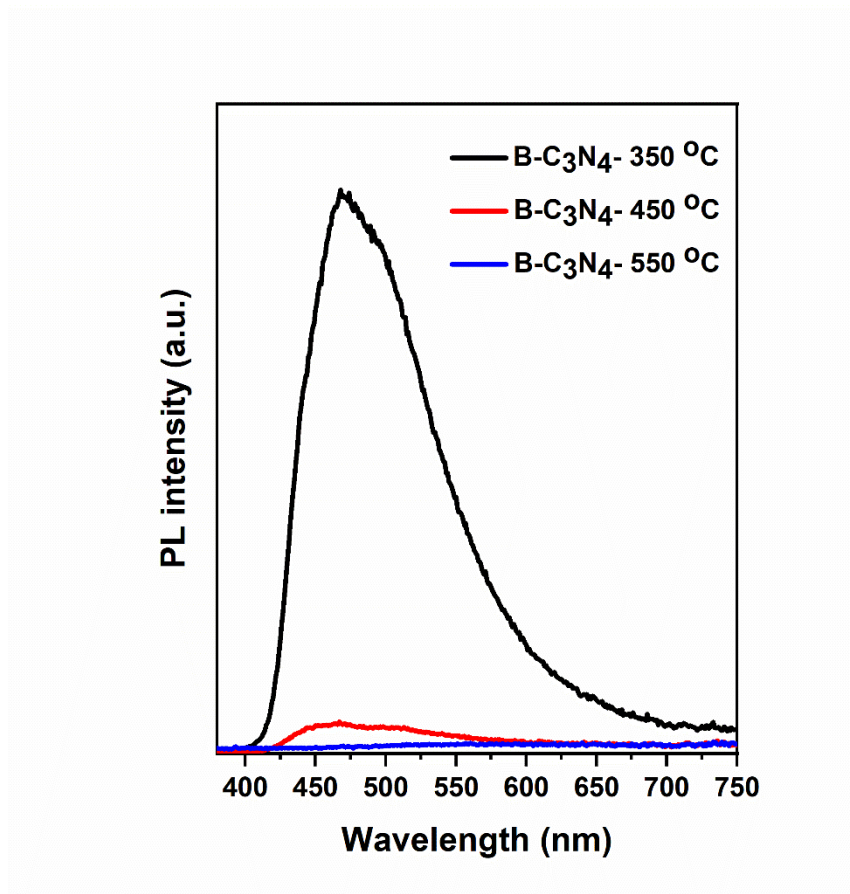

**Figure S6.** PL spectra of B-C<sub>3</sub>N<sub>4</sub> samples at different heat-treatment temperatures.

## Supplementary information

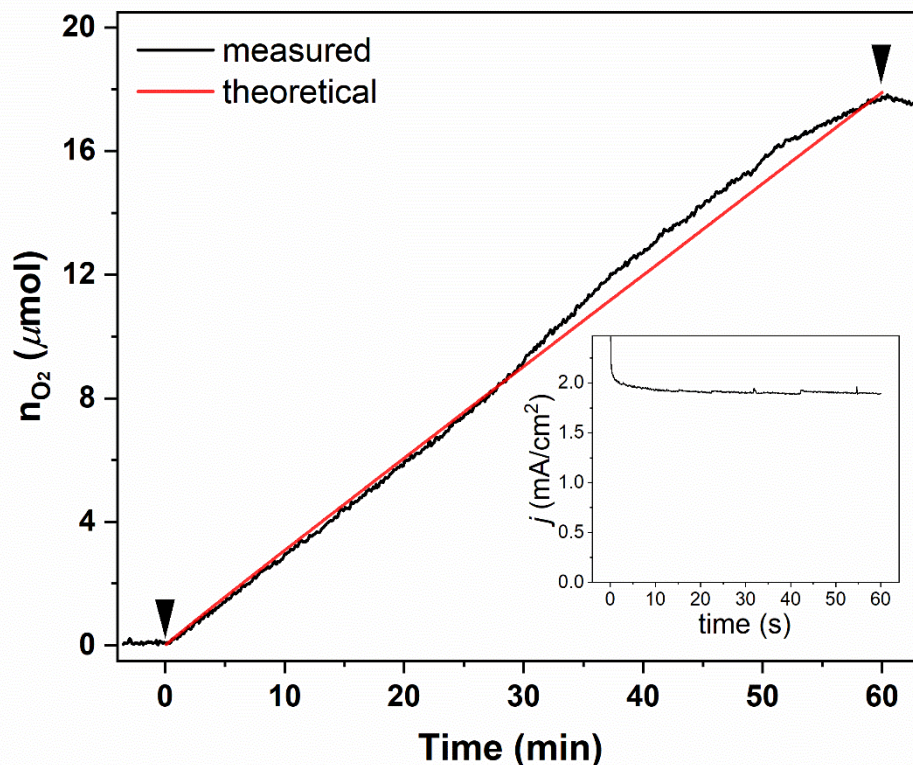

**Figure S7.** Detected oxygen (black line) and the theoretical amount (red line) in the course of a 1-hour CPE experiment at 1.7  $V_{\text{RHE}}$  reference electrode and irradiation at  $100 \text{ mW cm}^{-2}$  in 0.1 M  $\text{Na}_2\text{SO}_4$  at pH 7 using the  $\alpha\text{-Fe}_2\text{O}_3/\text{B-C}_3\text{N}_4\text{-450 } ^\circ\text{C}/\text{p-CNT}$  photoanode. The theoretical amount of produced oxygen was calculated from the charge as  $n_{O_2} = Q/4F$ , where  $n$  is the molar amount of  $\text{O}_2$ ,  $Q$  is the passed charge in Coulombs,  $F$  is the Faraday constant, 96485 C/mol. The black marks indicate the start and the end of the CPE experiment. **Inset:** current density during the experiment.



## Supplementary information

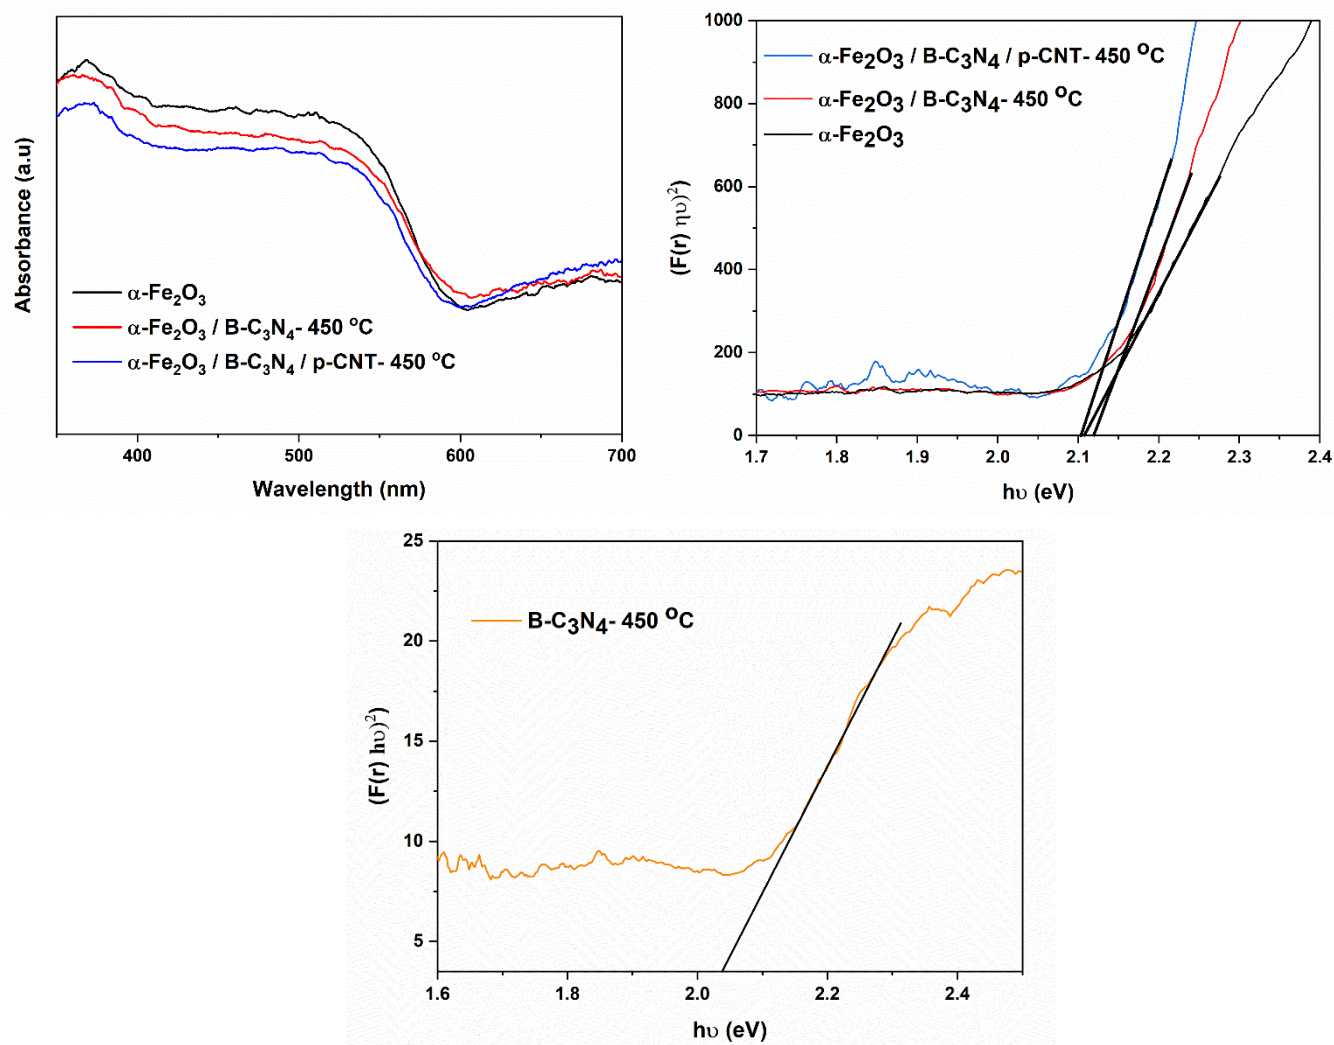

**Figure S8.** Optical absorbance spectra (DRS) and Tauc plots for the samples as indicated in the legend. The optical absorption ability of  $\alpha\text{-Fe}_2\text{O}_3/\text{B-C}_3\text{N}_4\text{-450 }^\circ\text{C}/\text{p-CNT}$  was unchanged, and the remarkable PEC enhancement should be attributed to the surface charge property modification by  $\text{B-C}_3\text{N}_4\text{-450 }^\circ\text{C}$  and p-CNT decoration. The UV-vis spectra have very little difference among all the photoanodes, indicating the negligible influence of  $\text{B-C}_3\text{N}_4\text{-450 }^\circ\text{C}$  and/or p-CNT decoration on the optical absorption of hematite due to the low loadings. The absorption edges of  $\alpha\text{-Fe}_2\text{O}_3$ ,  $\alpha\text{-Fe}_2\text{O}_3/\text{B-C}_3\text{N}_4\text{-450 }^\circ\text{C}$ , and  $\alpha\text{-Fe}_2\text{O}_3/\text{B-C}_3\text{N}_4\text{-450 }^\circ\text{C}/\text{p-CNT}$  are located *ca.* 590 nm, and the corresponding bandgaps ( $E_g$ ) of the corresponding samples are calculated by Tauc method to be *ca.* 2.10 eV and 2.04 eV for  $\text{B-C}_3\text{N}_4\text{-450 }^\circ\text{C}$ .

## Supplementary information

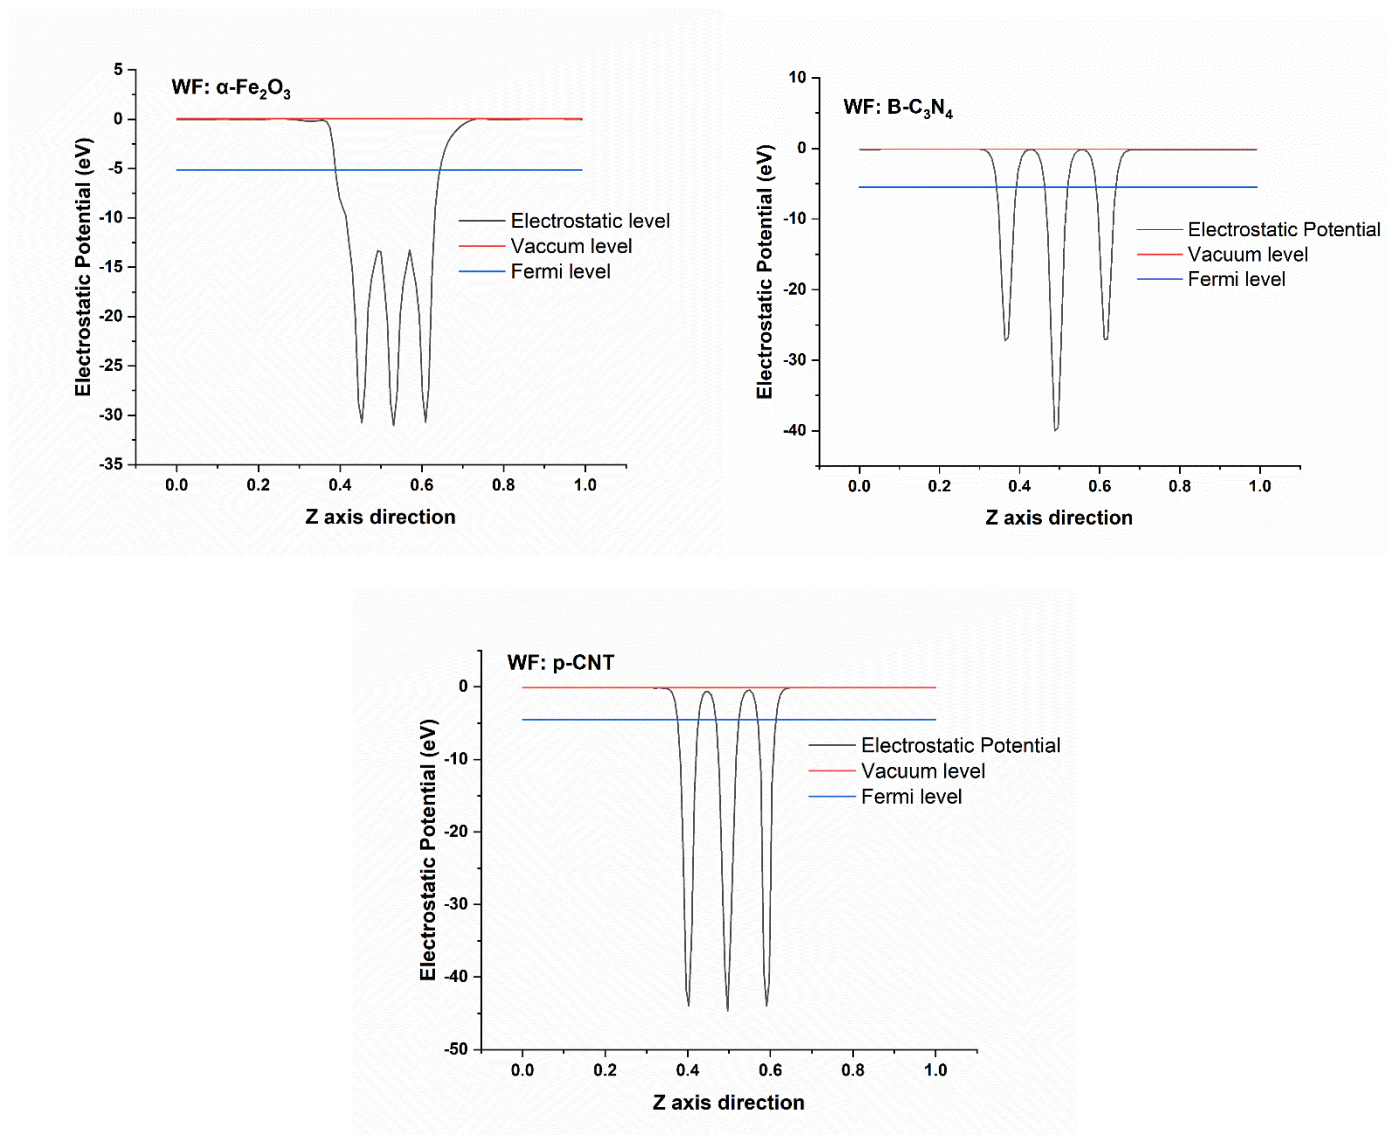

**Figure S9.** The work functions as calculated for  $\alpha$ -Fe<sub>2</sub>O<sub>3</sub>, B-C<sub>3</sub>N<sub>4</sub>, and p-CNT are 5.18, 5.39, and 4.18 eV.
